# Supplementary material
Source: MDPI journal article supplement (https://www.mdpi.com/2079-6412/11/5/588)
Supplement: s1 [file s1]

# Structural, Magnetic and Gas Sensing Activity of Pure and Cr Doped $\text{In}_2\text{O}_3$ Thin Films Grown by Pulsed Laser Deposition

Kamatam Hari Prasad <sup>1,2,\*</sup>, Karuppiyah Deva Arun Kumar <sup>3</sup>, Paolo Mele <sup>3,\*</sup>, Arulanandam Jegatha Christy <sup>4</sup>, Kugalur Venkidusamy Gunavathy <sup>5</sup>, Sultan Alomairy <sup>6</sup> and Mohammed Sultan Al-Buriahi <sup>7</sup>

<sup>1</sup> Department of Physics, Institute of Aeronautical Engineering, Dundigal, Hyderabad 500043, India

<sup>2</sup> Department of Physics, Pondicherry University, Puducherry 605014, India

<sup>3</sup> College of Engineering, Shibaura Institute of Technology, Saitama 337-8570, Japan; i048267@shibaura-it.ac.jp

<sup>4</sup> Department of Physics, Jayaraj Annapackiam College for Women, Periyakulam, Theni 625601, India; jegathachristy@gmail.com

<sup>5</sup> Department of Physics, Kongu Engineering College, Perundurai 638060, India; gunavathy@kongu.ac.in

<sup>6</sup> Department of Physics, College of Science, Taif University, P.O. Box 11099, Taif 21944, Saudi Arabia; s.alomairy@tu.edu.sa

<sup>7</sup> Department of Physics, Sakarya University, Sakarya 54100, Turkey; mohammed.al-buriahi@ogr.sakarya.edu.tr

\* Correspondence: hariprasad.kamatam@gmail.com (K.H.P.); pmele@shibaura-it.ac.jp (P.M.)

## Supplementary figures

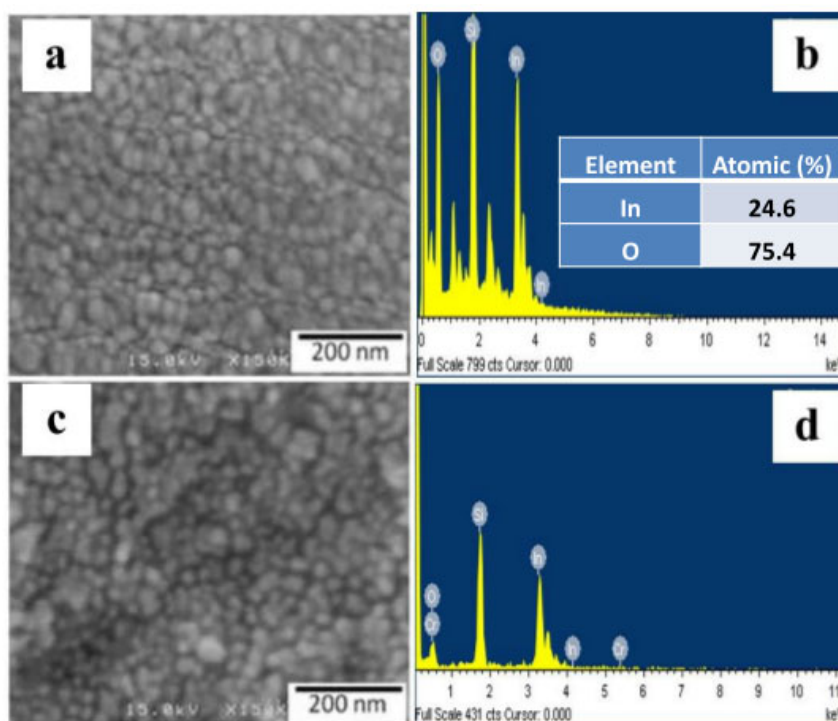

**Figure S1.** SEM micrographs of the (a) pure  $\text{In}_2\text{O}_3$ , (c) Cr doped  $\text{In}_2\text{O}_3$  thin films; and EDX spectrum of (b) pure  $\text{In}_2\text{O}_3$ , (d) Cr doped  $\text{In}_2\text{O}_3$  thin films.

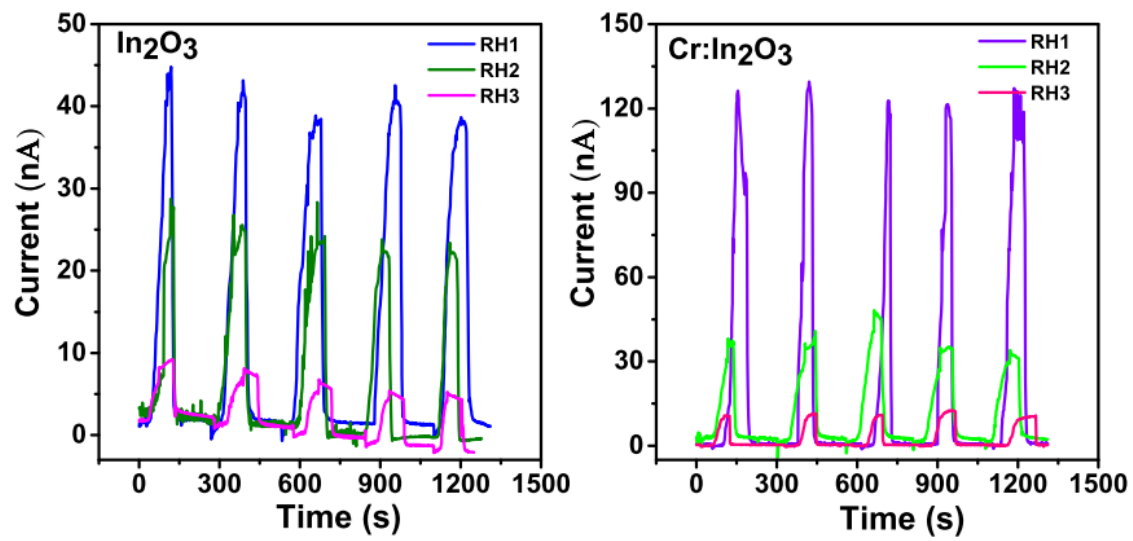

Figure S2. Relative humidity effect of on the electric current for pure In<sub>2</sub>O<sub>3</sub> and Cr doped In<sub>2</sub>O<sub>3</sub> thin films.
